# Supplementary material for: Osimertinib for Japanese patients with T790M‐positive advanced non‐small‐cell lung cancer: A pooled subgroup analysis
Source: PubMed Central journal article supplement — Cancer Sci. 2019 Aug 1;110(9):2884–93. doi: 10.1111/cas.14120 (PMC6726692; doi:10.1111/cas.14120), 2019-08-01
Supplement: CAS-110-2884-s002.pdf [file CAS-110-2884-s002.pdf]

**TABLE S1.** List of investigators/institutions

| <b>Investigator</b>   | <b>Study site</b>                                                                                                              |
|-----------------------|--------------------------------------------------------------------------------------------------------------------------------|
| <i>AURA Extension</i> |                                                                                                                                |
| Dr Kiyotaka Yoh       | National Cancer Center Hospital East                                                                                           |
| Dr Naoyuki Nogami     | National Hospital Organization Shikoku Cancer Center                                                                           |
| Dr Yasuhito Fujisaka  | Osaka Medical College Hospital                                                                                                 |
| Dr Takayasu Kurata    | Kansai Medical University Hospital                                                                                             |
| Dr Toshiaki Takahashi | Shizuoka Cancer Center                                                                                                         |
| Dr Masato Shingyoji   | Chiba Cancer Center                                                                                                            |
| Dr Norihiko Ikeda     | Tokyo Medical University Hospital                                                                                              |
| Dr Kazuo Kasahara     | Kanazawa University Hospital                                                                                                   |
| Dr Tomonori Hirashima | Osaka Habikino Medical Center                                                                                                  |
| Dr Nobuyuki Katakami  | Institute of Biomedical Research and Innovation Hospital                                                                       |
| Dr Katsuyuki Kiura    | Okayama University Hospital                                                                                                    |
| Dr Isamu Okamoto      | Kyushu University Hospital                                                                                                     |
| Dr Hiroaki Okamoto    | Yokohama Municipal Citizen's Hospital                                                                                          |
| Dr Yasuo Iwamoto      | Hiroshima City Hospital Organization Local Incorporated<br>Administrative Agency Hiroshima City Hiroshima<br>Citizens Hospital |
| <i>AURA2</i>          |                                                                                                                                |
| Dr Makoto Nishio      | The Cancer Institute Hospital of Japanese Foundation<br>for Cancer Research                                                    |
| Dr Hideo Saka         | National Hospital Organisation Nagoya Medical Center                                                                           |
| Dr Toyoaki Hida       | Aichi Cancer Center Hospital                                                                                                   |
| Dr Fumio Imamura      | Osaka International Cancer Institute                                                                                           |

|                      |                                                                     |
|----------------------|---------------------------------------------------------------------|
| Dr Shinji Atagi      | National Hospital Organization Kinki - Chuo Chest<br>Medical Center |
| Dr Miyako Satouchi   | Hyogo Cancer Center                                                 |
| Dr Hiroshi Tanaka    | Niigata Cancer Center Hospital                                      |
| Dr Hiroshi Sakai     | Saitama Cancer Center                                               |
| Dr Terufumi Kato     | Kanagawa Cardiovascular and Respiratory Center                      |
| Dr Hiroshi Nokihara  | National Cancer Center Hospital                                     |
| Dr Koji Takeda       | Osaka City General Hospital                                         |
| Dr Kazuhiko Nakagawa | Kinki University Hospital                                           |
| Dr Hiroaki Akamatsu  | Wakayama Medical University Hospital                                |
| Dr Koji Inoue        | Kitakyushu Municipal Medical Centre                                 |

---
