# Supplementary material for: Osimertinib for Japanese patients with T790M‐positive advanced non‐small‐cell lung cancer: A pooled subgroup analysis
Source: PubMed Central journal article supplement — Cancer Sci. 2019 Aug 1;110(9):2884–93. doi: 10.1111/cas.14120 (PMC6726692; doi:10.1111/cas.14120), 2019-08-01
Supplement: CAS-110-2884-s003.pdf [file CAS-110-2884-s003.pdf]

**TABLE S2.** Possibly related AEs in ≥10% of patients and possibly related selected AEs

|                                                 | Number of patients, n (%) (N = 81) |           |           |          |
|-------------------------------------------------|------------------------------------|-----------|-----------|----------|
|                                                 | Total                              | Grade 1   | Grade 2   | Grade ≥3 |
| <b>Possibly related AEs in ≥10% of patients</b> |                                    |           |           |          |
| Rash (grouped term)                             | 48 (59.3)                          | 31 (38.3) | 14 (17.3) | 3 (3.7)  |
| Paronychia (grouped term)                       | 40 (49.4)                          | 17 (21.0) | 23 (28.4) | 0        |
| Diarrhea                                        | 32 (39.5)                          | 26 (32.1) | 4 (4.9)   | 2 (2.5)  |
| Dry skin (grouped term)                         | 29 (35.8)                          | 22 (27.2) | 7 (8.6)   | 0        |
| White blood cell count decreased                | 23 (28.4)                          | 4 (4.9)   | 15 (18.5) | 4 (4.9)  |
| Platelet count decreased                        | 20 (24.7)                          | 17 (21.0) | 2 (2.5)   | 1 (1.2)  |
| Stomatitis                                      | 19 (23.5)                          | 14 (17.3) | 5 (6.2)   | 0        |
| Anemia                                          | 12 (14.8)                          | 3 (3.7)   | 5 (6.2)   | 4 (4.9)  |
| Neutrophil count decreased                      | 12 (14.8)                          | 2 (2.5)   | 6 (7.4)   | 4 (4.9)  |
| Alanine aminotransferase increased              | 11 (13.6)                          | 7 (8.6)   | 1 (1.2)   | 3 (3.7)  |
| Aspartate aminotransferase increased            | 11 (13.6)                          | 8 (9.9)   | 1 (1.2)   | 2 (2.5)  |
| <b>Possibly related selected AEs</b>            |                                    |           |           |          |
| ILD (grouped term)                              | 5 (6.2)                            | 2 (2.5)   | 0         | 3 (3.7)  |
| Hyperglycemia                                   | 1 (1.2)                            | 0         | 1 (1.2)   | 0        |
| Electrocardiogram QT prolonged                  | 6 (7.4)                            | 4 (4.9)   | 1 (1.2)   | 1 (1.2)  |

Adverse events and possible relation were assessed by the investigator. In this pooled analysis, there were a total of 2 (5.7%) patients who presented grade 5 AEs that occurred in the AURA extension study. These corresponded to two cases of ILD. AEs, adverse events; ILD, interstitial lung disease.
