# Supplementary figures and images for: Osimertinib for Japanese patients with T790M‐positive advanced non‐small‐cell lung cancer: A pooled subgroup analysis
Source: PubMed Central journal article supplement — Cancer Sci. 2019 Aug 1;110(9):2884–93. doi: 10.1111/cas.14120 (PMC6726692; doi:10.1111/cas.14120), 2019-08-01

**FIGURE S1.** Study flow chart of AURA phase I and phase II, and AURA2

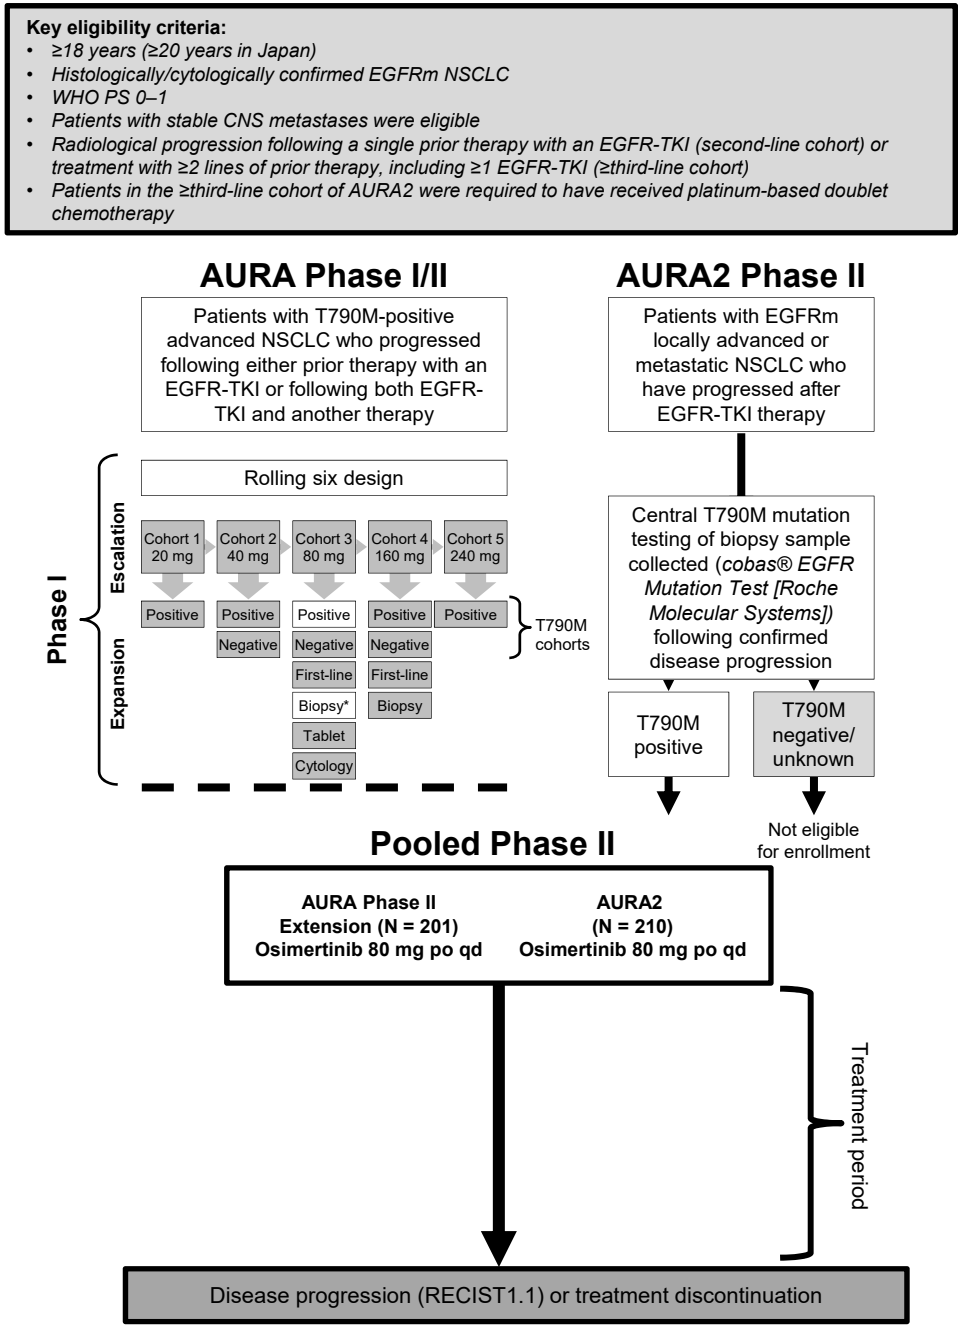

Supplement: CAS-110-2884-s001.pdf [file CAS-110-2884-s001.pdf]
